# Supplementary material for: Islamic reasoning and the use of prohibited medicines among Muslim patients: A qualitative study
Source: Research Square preprint supplement (doi:10.21203/rs.3.rs-7552990/v1), 2025-09-15
Supplement: Supplementary file 1 [file 2909a7449c92721cc2fcd277.docx]

Supplementary material: Researcher identity memo, interview schedule, and thematic development table

Bilal Ali, University of Portsmouth, School of Medicine, Pharmacy and Biomedical Sciences, Portsmouth, United Kingdom.

Researcher identity memo

I consider myself a practising Muslim with in-depth knowledge of parts of the Islamic religious tradition. I don’t consider myself a lay Muslim or a fully-fledged scholar of Islam, but I do think that I am conversant in particular aspects of the tradition, having undergone a long history of Islamic studies both publicly and privately.

My personal experience in practice was the impetus for the research. I have worked as both a community pharmacist and a hospital based pharmacist, including many years in London, serving a predominantly South Asian Muslim population in a multicultural setting.

The initial research question came from a personal dilemma around the permissibility of certain ingredients in the medicines I use. Although I’ve grappled with this issue personally, I now approach the question from a research perspective and consider my emerging answers informed by scholarly exploration rather than theological certainty.

I follow the *Hanafi* school of Islamic jurisprudence, but I recognise that the school is not as uniform as some of its followers assume it to be. Multiple positions within the school are historically grounded, alongside modern interpretations shaped by political and cultural currents. These include the longstanding religio-political differences between groups such as the *Deobandis* and the *Barelwis* and the internal variations between *Uthmani*, Damascus-based, and Kuwaiti *Hanafis*.

My initial thoughts about interviewing Muslims were framed by the sense that I belong to the community. I am an insider, not only in terms of religious belief but also in terms of culture. In Britain, Islam is often seen through a racialised lens as a religion of brown men and women. Because of this, I assumed that building trust with participants would not be a significant barrier. I saw this as an advantage.

Since I consider myself to be religious, I also assume that many Muslims take seriously core aspects of the religion, in this case, matters of *halal* and *haram*, notably concerning food and medicine. I doubt a non-Muslim researcher would have the same level of access or rapport with participants that I do. I hope my position will help overcome one of the key challenges in research with minority communities: inclusion[[1]](#footnote-1). I also acknowledge that this work is driven, at least in part, by a personal motivation towards what might be called a social justice agenda:

1. Giving voice to a marginalised group
2. Contributing to social critique and possible change, what might be called transformative inquiry

At the same time, I am aware of the double-edged nature of insider research. As I think more deeply about reflexivity and its various forms, I worry that, because this is a question I have personally wrestled with for some time, I may over-represent my views and experiences. I know what I would do. I understand the complexity of the jurisprudential reasoning. My concern is whether I might unknowingly steer the data towards my own conclusions or miss important insights due to blind spots.

Being seen as ‘one of them’ does bring advantages; I do not need to be re-socialised into another cultural setting or learn how to navigate unfamiliar norms[[2]](#footnote-2). But I am also conscious of what I bring into the interview setting: my beard, my skin colour, my accent, and especially the way I pronounce Arabic terms. The more Arabic you sound, the more religious you are assumed to be, especially if you are not Arab. I anticipate that these factors may influence how participants perceive me and how they respond. This is part of the reflexive task I will continue to engage with throughout the research[[3]](#footnote-3).

I am not especially concerned about how the research will affect my beliefs or practices, a position referred to as retrospective reflexivity[[4]](#footnote-4), but perhaps I should be. I acknowledge that reflexivity is not a one-off exercise. It will need to continue throughout the research process.

Semi-structured in-depth interview guide

**Section 1: Opening:**

*“Hi, I’m (researcher name). I’m working on a research project at the School of Pharmacy and Biomedical Sciences in Portsmouth, and I'd like to discuss it with you. Thank you for taking the time to talk with me.”*

*“The purpose of these interview questions is to understand the experiences of Muslims using medicines that might be considered haram in Islam. We’re also interested in learning how these situations are managed, any problems that happen, and their impact.”*

*“This research will help us find better ways to understand your community’s needs in these situations. Your personal experiences are really important to this study.”*

*“Please feel free to speak openly, knowing everything you say will be confidential. All the data we collect will be anonymised, so your identity will remain protected when the project is completed.”*

*“This interview should take about 75 minutes. How does that sound?”*

**Section 2: Demography:**

*“To better understand your background, could you please tell me a little about yourself, including your age, gender, work or studies, and ethnic background? Also, if there are other aspects of your background that you feel are important, please feel free to share those as well.”*

**Section 3: Structural questions:**

“*Could you please describe your religious identity and how much you practice your faith?”*

*“How would you define your religious beliefs and practices?”*

*“Can you elaborate on the importance of religion in your daily life and how it influences your decision-making?”*

*“How frequently do you engage in religious activities or rituals, such as attending a mosque or other practices?”*

*“In your own words, how religious do you consider yourself?”*

*“Have there been any significant experiences or events that have shaped your religious identity?”*

**Section 4: Core questions:**

*“How do you approach following religious dietary requirements in your daily life?”*

*“What role do these dietary rules play in your everyday life?”*

*“Have you encountered situations where following dietary rules was challenging? How did you handle those?”*

*“Can you describe your understanding and awareness of medicines that might conflict with your religious beliefs?”*

*“How much do you know about medicines that might not be permissible according to Islamic beliefs and practices?”*

*“What are your thoughts on taking medicines that may contain ingredients not usually thought permissible in your religion?”*

*“Can you share some of your experiences with medicines that are not allowed by your religion?”*

*“Have you ever had to deal with medicines that might conflict with your religious beliefs?”*

*“What kinds of problems or dilemmas have you faced with these medicines?”*

*“Can you tell me how you handled any of the problems you came across?”*

**Section 5: Scenarios:**

*“If you were given medication that contains ingredients you believe may conflict with your religious beliefs, how would you approach that situation?”*

*“How would you respond if you found out that a medication prescribed to you contained ingredients that conflict with your religious beliefs?”*

*“Scenario 1: Imagine you've been prescribed antibiotics for a chest infection and noticed that the capsules might contain gelatin. How would you approach this situation?”*

*“Scenario 2: Suppose you've been prescribed an oral gel for an infection and discovered that it might contain alcohol (ethanol). How would you handle this situation?”*

**Section 6: Contrast questions:**

*“How do your expectations of your healthcare provider change regarding medicines that might conflict with your religious beliefs?”*

*“What do you think your healthcare provider should do differently when prescribing or dispensing these medicines?”*

*“What role do you think your healthcare provider should play when discussing religious concerns about medications compared to other types of information?”*

*“Do you feel it’s more important for your healthcare provider to bring up these concerns, or is it something you think you should initiate? Why?”*

*“What suggestions do you have for how your needs could be better met regarding medicines that might conflict with your religious beliefs?”*

*“How do you think the process of prescribing or dispensing medicines that might conflict with your religious beliefs could be made better?”*

*“Is there anything you feel is missing or that should be looked at in the future regarding your care and medicines that might conflict with your religious beliefs?”*

**Section 7: Conclusion:**

*“Thank you for your time and insights today. Before we wrap up, is there anything else you'd like to share about what we’ve discussed you think is important to mention regarding your experiences with halal and haram in diet and medicine? I really appreciate your participation.”*

Tracing thematic development: From initial codes to final themes

Development of themes and subthemes from initial codes

| Initial codes (examples) | Clustered or collapsed codes | Candidate themes | Final themes & subthemes |
| --- | --- | --- | --- |
| Islamic culture vs cultural Islam, Religion vs culture hierarchy, Being Muslim provides a sense of belonging | Cultural identity, Integration of religion and culture, Belonging | Halal-haram as meaning making, Halal cuisine, Fatalism | Theme 1: Halal as worldview  1.1 Islamic culture, not cultural Islam  1.2 “We didn't do what other people did” – halal food as identity |
| Food as nutrition vs Med as illness prevention, No 1-1 relationship between food-medicine, Medicines are impure | Comparisons of food vs medicine, Perceptions of synthetic/impure substances, Flexibility in medicine | Ethics and haram ingredients in medication, Tayyib, Distaste vs tolerability | Theme 2:To eat or not to eat – motivations for consumption.  2.1 Food is choice, so haram is fixed; illness is fate, so haram is flexible. 2.2 Haram food is distasteful; haram medicine is tolerable. |
| Major-Minor illness determines haram status, Adherence if no alternative to haram, Moral dilemma in taking haram-halal medicine | Illness severity influencing religious rulings, Necessity and non-adherence, Ethical compromise | Religious flexibility in critical situations, Moral deliberation | Theme 3: Minor illness or major disease.  3.1 Adherence in times of necessity |
| Doctors as endowed with trust, HCP cultural awareness is an expectation, Patient autonomy & informed consent | Cultural sensitivity, Shared decision-making, Trust and mistrust in HCPs | Supportive care, Awareness of haram-halal in healthcare, Trust in healthcare professionals | Theme 4: Personalised care  4.1 “It’s ultimately my choice, but we both should be in the know” – shared decision-making  4.2 Cultural competence |

1. Awaad R, Abolaban H, Maklad S, Ahmad R, Koopman C. Improving recruitment for mental health research in Muslim American women: research recruitment in Muslim American women. Community Ment Health J [Internet]. 2022 May 12;58(4):799–805. [↑](#footnote-ref-1)
2. Hammersley M. Taking sides in social research: essays on partisanship and bias. London: Routledge; 2000. [↑](#footnote-ref-2)
3. Mason J. Qualitative researching. 2nd ed. London: SAGE Publications; 2002. [↑](#footnote-ref-3)
4. Attia M, Edge J. Be(com)ing a reflexive researcher: a developmental approach to research methodology. Open Rev Educ Res [Internet]. 2017 Jan 16;4(1):33–45 [↑](#footnote-ref-4)
